## 1227

## Risk stratification of patients with asymptomatic moderate mitral regurgitation: the prognostic value of left atrial strain

Cameli M.<sup>1</sup>; Pastore MC.<sup>1</sup>; Righini FM.<sup>1</sup>; Mandoli GE.<sup>1</sup>; D'ascenzi F.<sup>1</sup>; Lisi M.<sup>1</sup>; Nistor D.<sup>2</sup>; Sparla S.<sup>1</sup>; Curci V.<sup>1</sup>; Di Tommaso C.<sup>1</sup>; Marino F.<sup>1</sup>; Stricagnoli M.<sup>1</sup>; Mondillo S.<sup>1</sup>

<sup>1</sup>University of Siena, Department of Cardiovascular Diseases, Siena, Italy

<sup>2</sup>University of Medicine of Targu Mures, Department M3, Targu Mures, Romania

**Background.** In asymptomatic moderate mitral regurgitation (MR), the criteria for risk stratification are still uncertain. Therefore, in these patients, optimal time of surgery remains controversial.

**Purpose.** Our aim was to compare left atrial (LA) strain to other echocardiographic parameters for the prediction of cardiovascular (CV) events in patients with asymptomatic moderate MR.

**Methods.** 401 patients with primary degenerative asymptomatic moderate MR was enrolled and prospectively followed for the development of CV events (i.e. atrial fibrillation, stroke/transient ischemic attack, acute heart failure, CV death). Patients with history of atrial fibrillation, myocardial infarction, heart failure, cardiac surgery or heart transplantation, severe MR, mitral valve surgery during follow-up were excluded.

**Results.** During a mean follow up of  $3.4 \pm 2$  years, of the 326 patients eligible (mean age  $65 \pm 9$  years), 122 patients had 149 new events. There were no significant differences in mean age and sex, clinical and therapeutic characteristics between the two groups. The event-group presented reduced global peak atrial longitudinal strain (PALS), LA emptying fraction, LV strain at baseline, and larger LA volume indexed ( $p < 0.0001$ ). Receiver operating characteristics curves proved the greatest predictive performance for global PALS  $< 35\%$  (AUC 0.88). Bland-Altman analysis demonstrated good intra- and inter-observer agreement and Kaplan Meier analysis showed a graded association between PALS and event-free-survival.

**Conclusions.** Speckle tracking echocardiography could provide a useful index, global PALS, to estimate LA function in patients with asymptomatic moderate MR in order to optimize surgical timing before the development of irreversible myocardial dysfunction.

Echo-data of our study population

| Variable                                          | No CV events (n = 204) | CV events (n = 122) |
|---------------------------------------------------|------------------------|---------------------|
| LV ejection fraction (%)                          | $59 \pm 9$             | $58 \pm 10$         |
| LV global longitudinal strain (%)                 | $-18.5 \pm 3.4$        | $-17.6 \pm 3.6^*$   |
| LA volume indexed (ml/m <sup>2</sup> )            | $32.5 \pm 6.7$         | $36.4 \pm 7.1^*$    |
| LA emptying fraction (%)                          | $68 \pm 13$            | $62 \pm 15^*$       |
| Mitral E/A ratio                                  | $0.94 \pm 0.14$        | $0.95 \pm 0.16$     |
| Mitral E/E' ratio                                 | $11.2 \pm 6.5$         | $12.4 \pm 7.1$      |
| Mitral regurgitant fraction (%)                   | $38.9 \pm 8.1$         | $39.1 \pm 9.4$      |
| End regurgitation orifice area (cm <sup>2</sup> ) | $0.34 \pm 0.05$        | $0.34 \pm 0.06$     |
| Global PALS (%)                                   | $32.5 \pm 8.5$         | $19.7 \pm 8.1^*$    |

\*Significant variation between groups. Cardiovascular, CV; Left atrial, LA; Left ventricular, LV; Peak atrial longitudinal strain, PALS

Abstract 1227 Figure. Event-free survival according to PALS

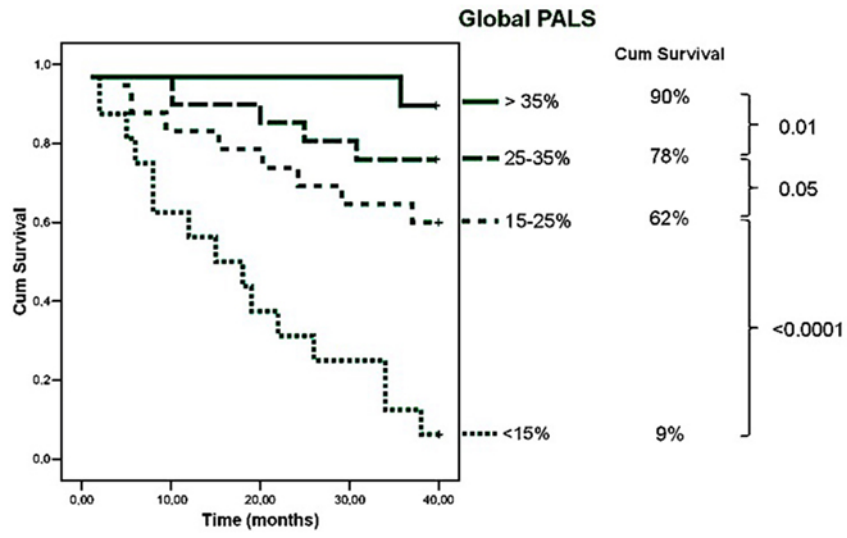

Source: http://academic.oup.com/ehjcimaging/article-pdf/21/Supplement_1/jez319.689/31865071/jez319.689.pdf
